1 **ARF1 dimerization is essential for vesicle trafficking and dependent on activation by ARF-GEF**  
2 **dimers in Arabidopsis**

3  
4 Sabine Brumm<sup>1</sup>, Mads Eggert Nielsen<sup>1,2</sup>, Sandra Richter<sup>1</sup>, Hauke Beckmann<sup>1</sup>, York-Dieter Stierhof<sup>3</sup>, Manoj  
5 K. Singh<sup>1</sup>, Angela-Melanie Fischer<sup>1</sup>, Venkatesan Sundaresan<sup>4</sup>, Gerd Jürgens<sup>1,\*</sup>

6  
7 <sup>1</sup> Center for Plant Molecular Biology (ZMBP), Developmental Genetics, University of Tübingen, Auf der  
8 Morgenstelle 32, 72076 Tübingen, Germany

9 <sup>2</sup> University of Copenhagen, Faculty of Science, Section for Plant and Soil Science, Thorvaldsensvej 40,  
10 1871 Frederiksberg C, Denmark

11 <sup>3</sup> Center for Plant Molecular Biology (ZMBP), Microscopy, University of Tübingen, Auf der Morgenstelle  
12 32, 72076 Tübingen, Germany

13 <sup>4</sup> Department of Plant Biology and Department of Plant Sciences, University of California, Davis, One  
14 Shields Avenue, Davis, CA 95616, USA

15  
16 \* Corresponding author:  
17 Gerd Jürgens

18 Center for Plant Molecular Biology (ZMBP), Developmental Genetics, University of Tübingen, Auf der  
19 Morgenstelle 32, 72076 Tübingen, Germany

20 Phone: +49-7071-2978886

21 Email: [gerd.juergens@zmbp.uni-tuebingen.de](mailto:gerd.juergens@zmbp.uni-tuebingen.de)

22 ORCID: 0000-0003-4666-8308

23

24 **Short title**

25 Activation-dependent ARF1 dimerization

26

27 **Material distribution footnote**

28 The author responsible for distribution of materials integral to the findings presented in this article is:

29 Gerd Jürgens ([gerd.juergens@zmbp.uni-tuebingen.de](mailto:gerd.juergens@zmbp.uni-tuebingen.de)).

30 **Abstract**

31 Membrane traffic maintains the organization of the eukaryotic cell and delivers cargo proteins to their  
32 subcellular destinations such as sites of action or degradation. Membrane vesicle formation requires ARF  
33 GTPase activation by the SEC7 domain of ARF guanine-nucleotide exchange factors (ARF-GEFs),  
34 resulting in the recruitment of coat proteins by GTP-bound ARFs. *In vitro* exchange assays were done with  
35 monomeric proteins, although ARF-GEFs have been shown to form dimers *in vivo*. This feature is conserved  
36 across the eukaryotes, however its biological significance is unknown. Here we demonstrate ARF1  
37 dimerization *in vivo* and we show that ARF-GEF dimers mediate ARF1 dimer formation. Mutational  
38 disruption of ARF1 dimers interfered with ARF1-dependent trafficking but not coat protein recruitment in  
39 Arabidopsis. Mutations disrupting simultaneous binding of two ARF1•GDPs by the two SEC7 domains of  
40 GNOM ARF-GEF dimer prevented stable interaction of ARF1 with ARF-GEF and thus, efficient ARF1  
41 activation. Our results suggest a model of activation-dependent dimerization of membrane-inserted  
42 ARF1•GTP molecules required for coated membrane vesicle formation. Considering the evolutionary  
43 conservation of ARFs and ARF-GEFs, this initial regulatory step of membrane trafficking might well occur  
44 in eukaryotes in general.

45

46 **Keywords**

47 Membrane trafficking, vesicle formation, ARF1 GTPase, ARF-GEF, dimerization, FRET-FLIM, protein  
48 interaction, GNOM, Arabidopsis.

49

50

51

52

## 53 **Introduction**

54 Activation of small GTPase ARF1 by guanine-nucleotide exchange factors (ARF-GEFs) plays a pivotal role  
55 in membrane traffic across the eukaryotes (Donaldson and Jackson, 2011). GDP-bound ARF1 interacts with  
56 the catalytic SEC7 domain of ARF-GEFs on donor membranes, resulting in GDP-GTP exchange on ARF1  
57 and membrane insertion of its myristoylated N-terminal hasp (Casanova, 2007; Anders et al., 2008a; Bui et  
58 al., 2009). GTP-bound ARF1 interacts with coat proteins involved in vesicle formation and cargo  
59 recruitment (D'Souza-Schorey and Chavrier, 2006; Gillingham and Munro, 2007; Singh and Jürgens, 2018).  
60 ARF1•GTP forms dimers *in vitro*, which are required for scission of membrane vesicles from donor  
61 membrane (Beck et al., 2008 and 2011). ARF1 dimer formation is disrupted by a Y<sub>35</sub>A mutation, which  
62 reduces the yield of vesicles dramatically *in vitro* and fails to complement the lethality of *arf1 arf2* mutant  
63 yeast (Beck et al., 2008). How ARF1 dimers form *in vivo* has not been addressed but might be related to  
64 ARF-GEF action. Large ARF-GEFs such as human GBF1 or Arabidopsis GNOM have a stereotypic domain  
65 organization including an N-terminal dimerization (DCB) domain (Casanova, 2007; Anders et al., 2008;  
66 Bui et al., 2009). The DCB domain can interact with another DCB domain and with at least one other ARF-  
67 GEF domain (Grebe et al., 2000; Ramaen et al., 2007; Anders et al., 2008b). Although conserved across the  
68 eukaryotes, the biological significance of ARF-GEF dimerization is not known. Our results presented here  
69 suggest that ARF-GEF dimers generate ARF1•GTP dimers during the activation process, allowing  
70 productive vesicle formation.

71

## 72 **Results and Discussion**

### 73 **In-vivo occurrence and biological significance of ARF1 GTPase dimers**

74 To address the issue of ARF1 dimerization, we tested ARF1 wild-type and two variants – activation-  
75 deficient ARF1-T<sub>31</sub>N and hydrolysis-deficient ARF1-Q<sub>71</sub>L (Dascher and Balch, 1994; Singh and Richter et  
76 al., 2018) – for interaction by co-immunoprecipitation (for overview of mutant proteins see Supplemental  
77 Figure 1). Both ARF1-T<sub>31</sub>N and ARF1-Q<sub>71</sub>L co-precipitated endogenous ARF1, although ARF1 wild-type  
78 failed to do so (Figure 1A). However, ARF1-T<sub>31</sub>N strongly interacted with ARF-GEF GNOM whereas

79 ARF1-Q<sub>71</sub>L did not, suggesting that ARF1•GDPs might be bridged by ARF-GEF dimer whereas  
 80 ARF1•GTPs might display interaction independently of ARF-GEF. To test this idea, we made use of the  
 81 putatively dimerization-deficient ARF1-Y<sub>35</sub>A mutant (Beck et al., 2008). We generated transgenic  
 82 Arabidopsis lines that inducibly co-expressed either ARF1-Y<sub>35</sub>A,Q<sub>71</sub>L-GFP and ARF1-Y<sub>35</sub>A,Q<sub>71</sub>L-RFP or  
 83 ARF1-Q<sub>71</sub>L-GFP and ARF1-Q<sub>71</sub>L-RFP. FRET-FLIM measurements revealed interaction between ARF1-  
 84 Q<sub>71</sub>L proteins in seedling root cells, which was prevented by the additional Y<sub>35</sub>A mutation (Figure 1B).  
 85 These data suggest that membrane-bound ARF1•GTP molecules form dimers by direct physical interaction.

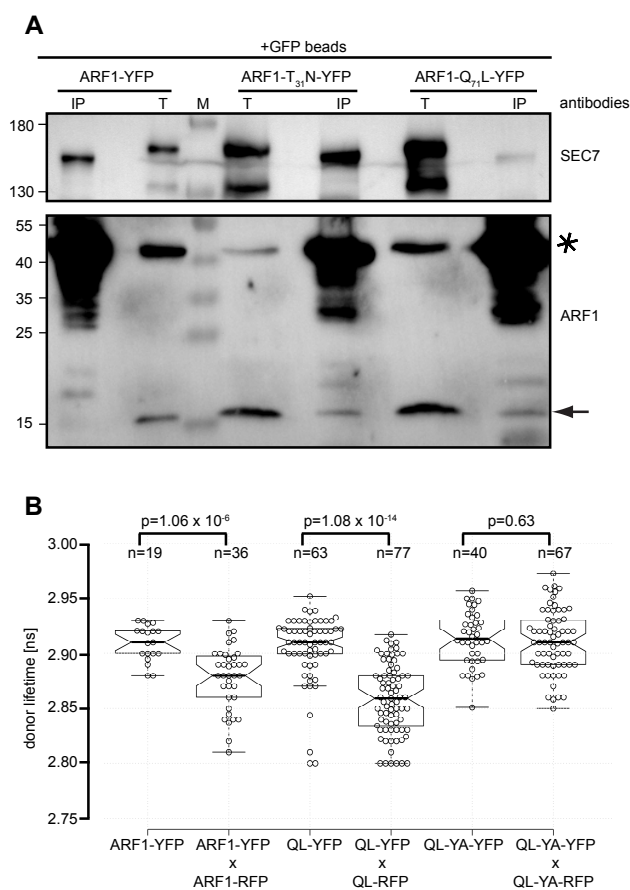

**Figure 1. In-vivo interaction between ARF1•GTP molecules revealed by co-immunoprecipitation and FRET-FLIM analysis.**

(A) Estradiol-inducible (20μM 7h) expression of ARF1-YFP, activation-deficient ARF1-T<sub>31</sub>N-YFP and hydrolysis-deficient ARF1-Q<sub>71</sub>L-YFP, immunoprecipitation with anti-GFP beads from transgenic Arabidopsis seedling extracts, and immunoblotting of PAGE-separated precipitates with anti-SEC7(GNOM) and anti-ARF1 antisera. Antisera indicated on the right. T, total extract; IP, immunoprecipitate; M, molecular markers (sizes in kDa indicated on the left). Asterisk, ARF1-YFP fusion proteins; arrow, endogenous ARF1 (both detected with anti-ARF1 antiserum); SEC7, antiserum detecting SEC7 domain of GNOM.

(B) FRET-FLIM analysis of ARF1-ARF1 interaction in Arabidopsis seedling root cells after estradiol induction (20μM 4h). The life time of hydrolysis-deficient ARF1-Q<sub>71</sub>L-YFP (QL-YFP) was reduced whereas ARF1-Q<sub>71</sub>L-YFP bearing dimerization-disrupting Y<sub>35</sub>A mutation (QL-YA-GFP) showed normal FRET-FLIM ratios. For comparison, the life time of ARF1-YFP was slightly reduced. Box plots of donor life time in ns of at least 19 independent measurements for

each sample (exact numbers are indicated by n). Medians are represented by the center lines and notches indicate 95% confidence interval. Tukey whiskers extend to the 1.5xIQR and data points are plotted as bee swarm. Exemplary p values (two tailed t-test assuming equal variances, alpha=0.05) are indicated in the graph.

86 To examine the biological significance of ARF1 dimers, we analyzed the ability of ARF1-Y<sub>35</sub>A to rescue  
 87 the secretion of alpha-amylase from tobacco protoplasts inhibited by ARF1-T<sub>31</sub>N expression (Figure 2A and  
 88 2B).



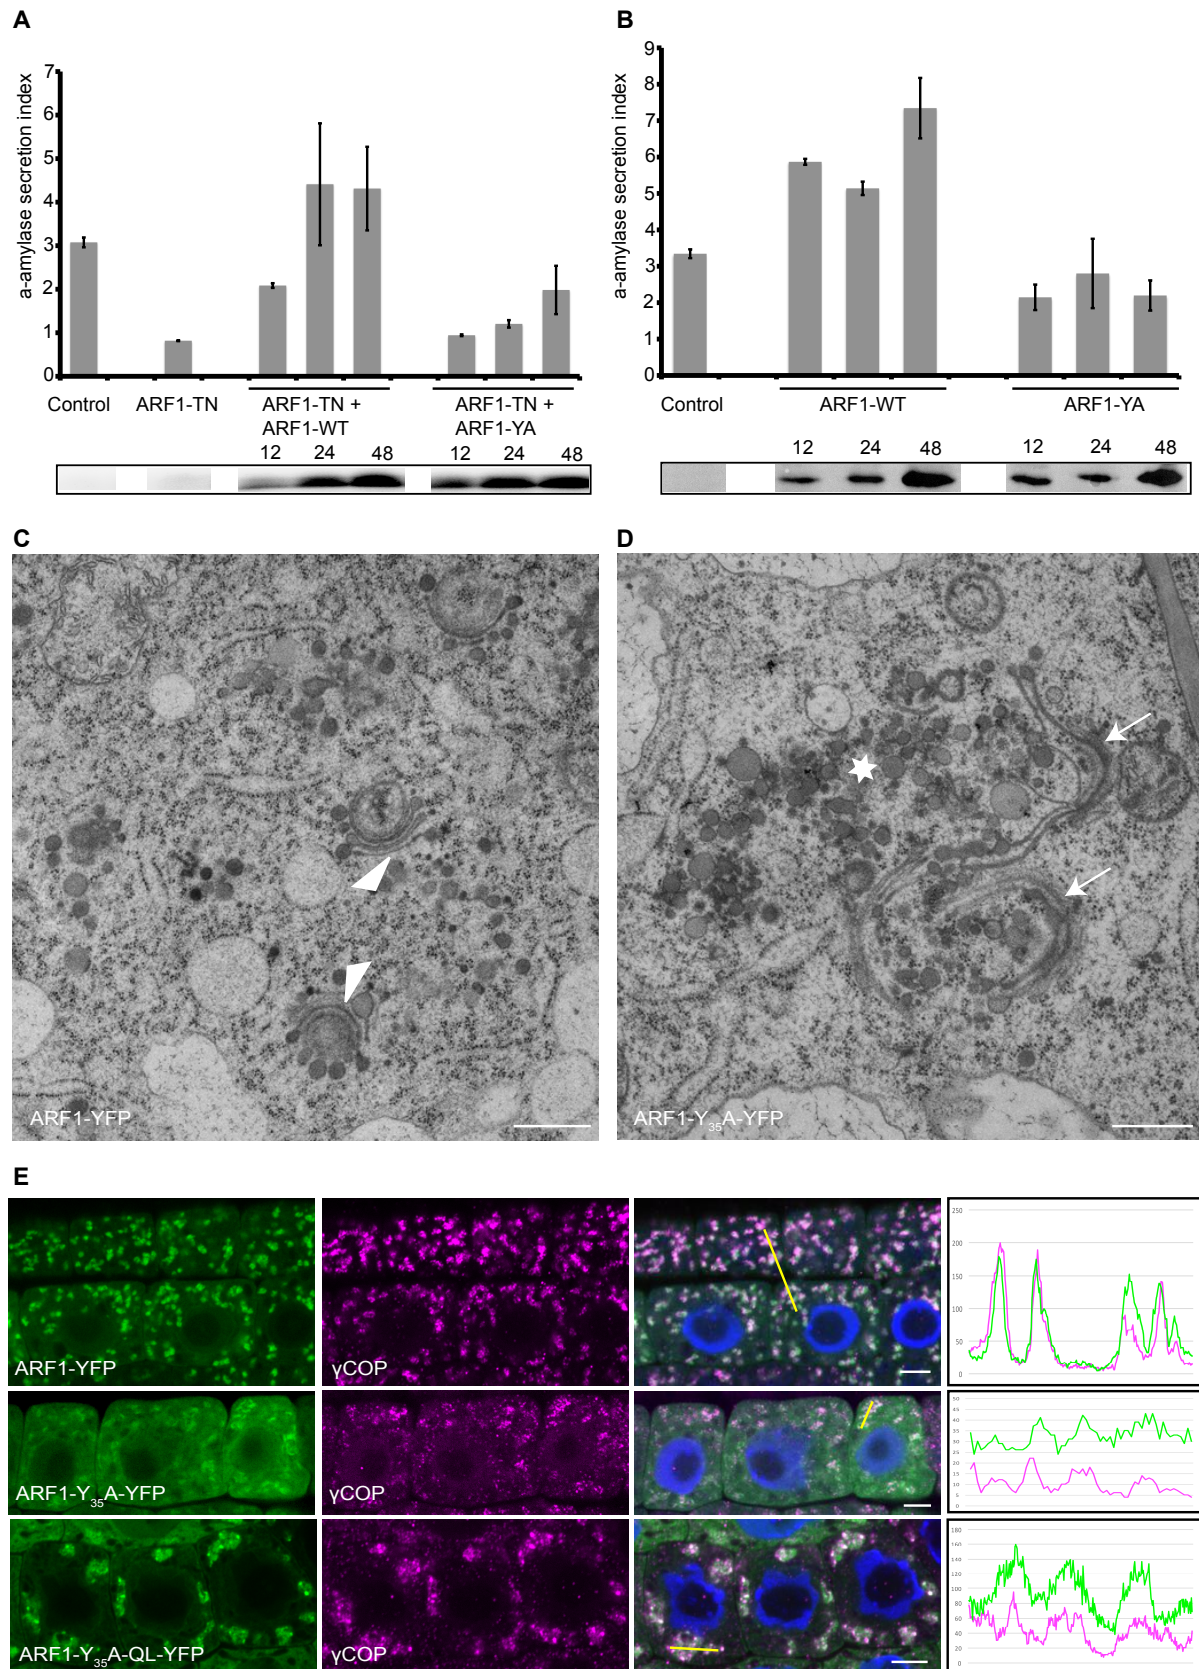

**Figure 2. Biological consequences of dimerization-deficient ARF1 expression**

(A, B) Secretion of alpha-amylase from tobacco protoplasts (A) inhibited by ARF1-T<sub>31</sub>N (TN) was restored by overexpression of ARF1 (WT) but not ARF1-Y<sub>35</sub>A (Y35A) and (B) impaired by ARF1-Y<sub>35</sub>A (Y35A) compared to wild-type control. Bottom panels: Antibody detection of GFP linked to ARF1 expression.

(C, D) Electron microscopic analysis of epidermal cells at the upper end of the seedling root meristem expressing ARF1-YFP (C) or ARF1-Y<sub>35</sub>A-YFP (D) in response to 10 μM estradiol for 4 h. Golgi stacks (arrowheads) were bent in (C) but replaced by clusters of interconnected membrane vesicles (asterisk) and Golgi remnants (arrows) in (D). Scale bars, 500 nm.

(E) Immunostaining of COPI subunit γCOP in seedling root cells expressing ARF1-YFP, ARF1-Y<sub>35</sub>A-YFP or ARF1-Y<sub>35</sub>A,Q<sub>71</sub>L-YFP in response to 20 μM estradiol for 4h. ARF1 variant (green), γCOP (magenta), merged images with DAPI-stained nuclei (blue). Co-localization of ARF1 and γCOP in regions of interest (ROI; yellow lines) shown in line intensity profiles. Scale bar, 5 μm.

89 Rising concentrations of co-expressed wild-type form of ARF1 overcame the inhibition by ARF1-T<sub>31</sub>N. In  
90 contrast, co-expression of comparable concentrations of ARF1-Y<sub>35</sub>A largely failed to restore alpha-amylase  
91 secretion (Figure 2A). In addition, strong expression of ARF1-Y<sub>35</sub>A interfered with alpha-amylase secretion  
92 on its own (Figure 2B). Thus, ARF1 dimerization is required for ARF1-dependent membrane trafficking.  
93 We also analyzed the consequences of ARF1-Y<sub>35</sub>A overexpression in seedling root cells at the  
94 ultrastructural level (Figure 2C and 2D). ARF1-Y<sub>35</sub>A disrupted Golgi organization, resulting in strings of  
95 interconnected membrane vesicles, whereas overexpression of ARF1 wild-type protein only caused slight  
96 bending of the Golgi stacks. However, overexpression of ARF1-Y<sub>35</sub>A did not interfere with membrane  
97 recruitment of COPI subunit γCOP (Figure 2E). Thus, ARF1 dimerization is essential for membrane  
98 trafficking.

99

## 100 **Regulation of ARF1 dimer formation**

101 How could ARF1 dimer formation be regulated? One candidate is the activating ARF-GEF which itself  
102 forms dimers (Ramaen et al., 2007; Anders et al., 2008). ARF1•GDP binding by ARF-GEF involves the C-  
103 terminal loop after helix J (loop>J) of the SEC7 domain of human GBF1, as demonstrated by specific  
104 mutations that interfere with ARF1 binding (Lowery et al., 2011). We introduced homologous mutations  
105 into Arabidopsis GNOM to generate GN-loop>J(3A) mutant protein (Figure 3A). To assess the biological  
106 consequences of the *GN-loop>J(3A)* mutation, we analyzed the mutant phenotypes of plants expressing the  
107 GN-loop>J(3A) mutant protein in various *gnom* mutant backgrounds (Figure 3B-G).

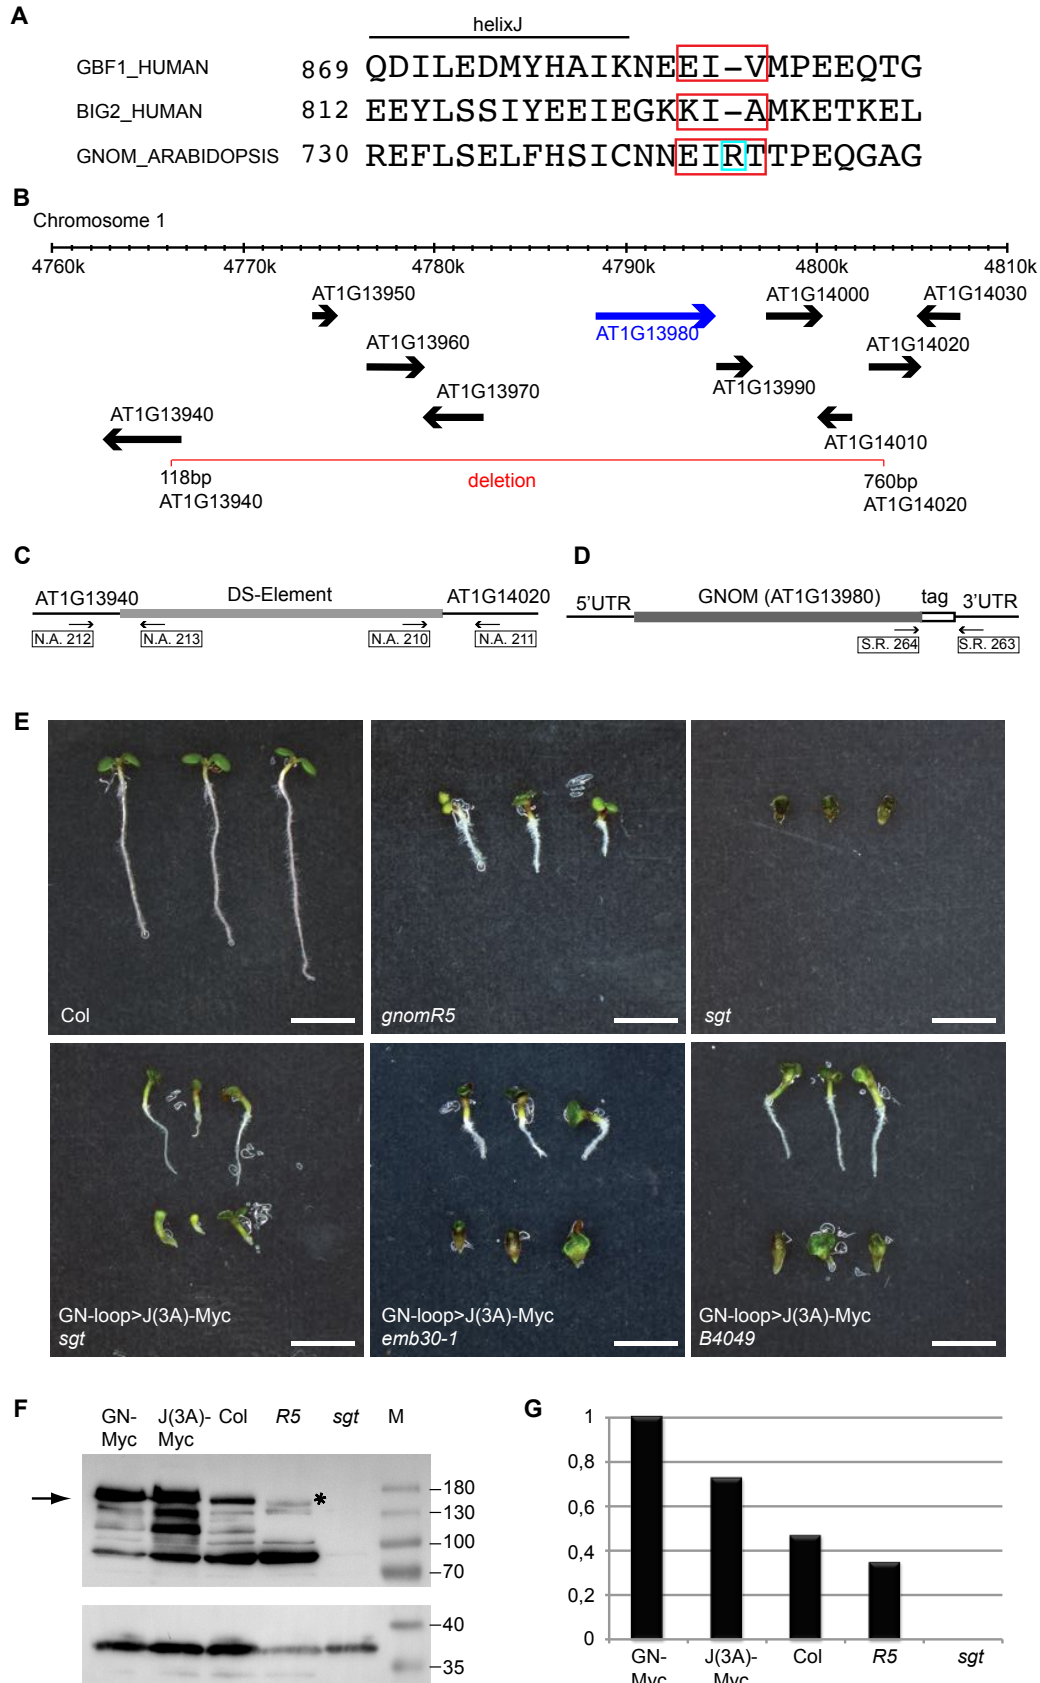

**Figure 3. Rescue activity of GN-loop>J(3A)-Myc in *gnom-sgt* deletion and other *gnom* mutants.**

(A) Alanine substitution sites (red boxes) in the loop after helix J (loop>J) of SEC7 domain of ARF-GEFs human GBF1 (Lowery et al., 2011), human BIG2 (Lowery et al., 2011) and Arabidopsis GNOM. In GN-loop>J(3A) mutant protein, amino acid residues 744 to 747 (EIRT) are replaced by AARA.

(B) Diagram of 50 kb genomic segment of chromosome 1 displaying GNOM and adjacent genes (arrows pointing towards 3' end). The *GNOM* gene is highlighted in blue. The straddling 37 kb deletion (named *gnom-sgt*) encompassing GNOM and 8 flanking genes is indicated by a red line (Kumaran et al., 1999). End points of deletion are indicated by basepair (bp) numbers of respective genes.

(C, D) Primer combinations for genotyping seedlings to detect (C) the *gnom-sgt* deletion or (D) the endogenous *GNOM* gene and a *GNOM* transgene encoding a C-terminally tagged protein.

(E) Wild-type seedlings (Col), *gnom-sgt* deletion seedlings (*sgt*) and partially rescued *gnom-sgt* deletion seedlings bearing a *GN-loop>J(3A)-Myc* transgene; seedlings homozygous for the weak *gnom-R5* allele are shown for comparison. Partial rescue of exchange-deficient *gnom* seedlings (*emb30*) or membrane-association-deficient *gnom* seedlings (*B4049*). Scale bars, 2.5 mm.

(F, G) GNOM protein expression levels of wild-type (Col), *gnom* mutant allele *R5*, *gnom-sgt* deletion (*sgt*), and *GNOM* transgenes *GNOM-myc* (GN-Myc) and *GN-loop>J(3A)* (*J(3A)-Myc*) detected by anti-SEC7 domain antiserum. Loading control: unstripped membrane re-probed with anti-SYP132 antiserum. (F) Immunoblot; M, marker lane; protein sizes in kDa on the right. Arrow, GNOM band at 165 kDa; asterisk, truncated GNOM protein of *gnom-R5* at 155 kDa. (G) Normalized expression levels; GNOM from *GN-myc* set at 1. Col, wild-type level of GNOM protein.

Note that *gnom-sgt* deletion zygotes complete embryogenesis and give rise to highly abnormal seedlings because the retrograde COPI traffic from Golgi to ER is jointly mediated by GNOM and the paralogous ARF-GEF GNL1 whereas the GNOM-mediated polar recycling of auxin efflux carrier PIN1 from endosomes to the basal plasma membrane cannot be mediated by GNL1 (Richter et al., 2007).

Note also that the mutations *emb30* and *B4049* both reside in the SEC7 domain of GNOM. Allele *emb30* codes for a catalytically inactive E<sub>658</sub>K mutant protein, resulting in grossly abnormal seedlings (Meinke, 1985; Mayer et al. 1993; Shevell et al., 1994). *B4049* codes for a G<sub>579</sub>R mutant protein that is still catalytically active but fails to associate with endomembranes because the DCB-ΔDCB interaction is compromised, which also results in grossly abnormal seedlings (Anders et al., 2008b; Busch et al., 1996).

108 The mutant protein displayed some residual activity, very incompletely rescuing the *gnom-sgt* deletion  
109 which spans *GNOM* and 4 adjacent genes on either side (Figure 3B and 3E). Interestingly, GN-loop>J(3A)  
110 mutant protein was not able to completely rescue *gnom* mutant alleles *emb30* and *B4049*, whereas the latter  
111 two complemented each other (Figure 3E; Busch et al., 1996; Anders et al., 2008). The rescued seedlings  
112 rather resembled phenotypically seedlings bearing the weak allele *gnomR5* (Geldner et al., 2004). Whereas  
113 *gnomR5* encodes C-terminally truncated GNOM protein that accumulated to reduced level compared to  
114 wild-type, GN>loop>J(3A) accumulated to higher level than wild-type, suggesting a primary defect in  
115 protein function rather than protein or RNA stability (Figure 3F and 3G). A more detailed phenotypic  
116 analysis of incompletely rescued seedlings revealed *gnomR5*-like defects in cotyledon vasculature, lateral  
117 root initiation and primary root growth, regardless of the *gnom* mutant background (Figure 4A-C).



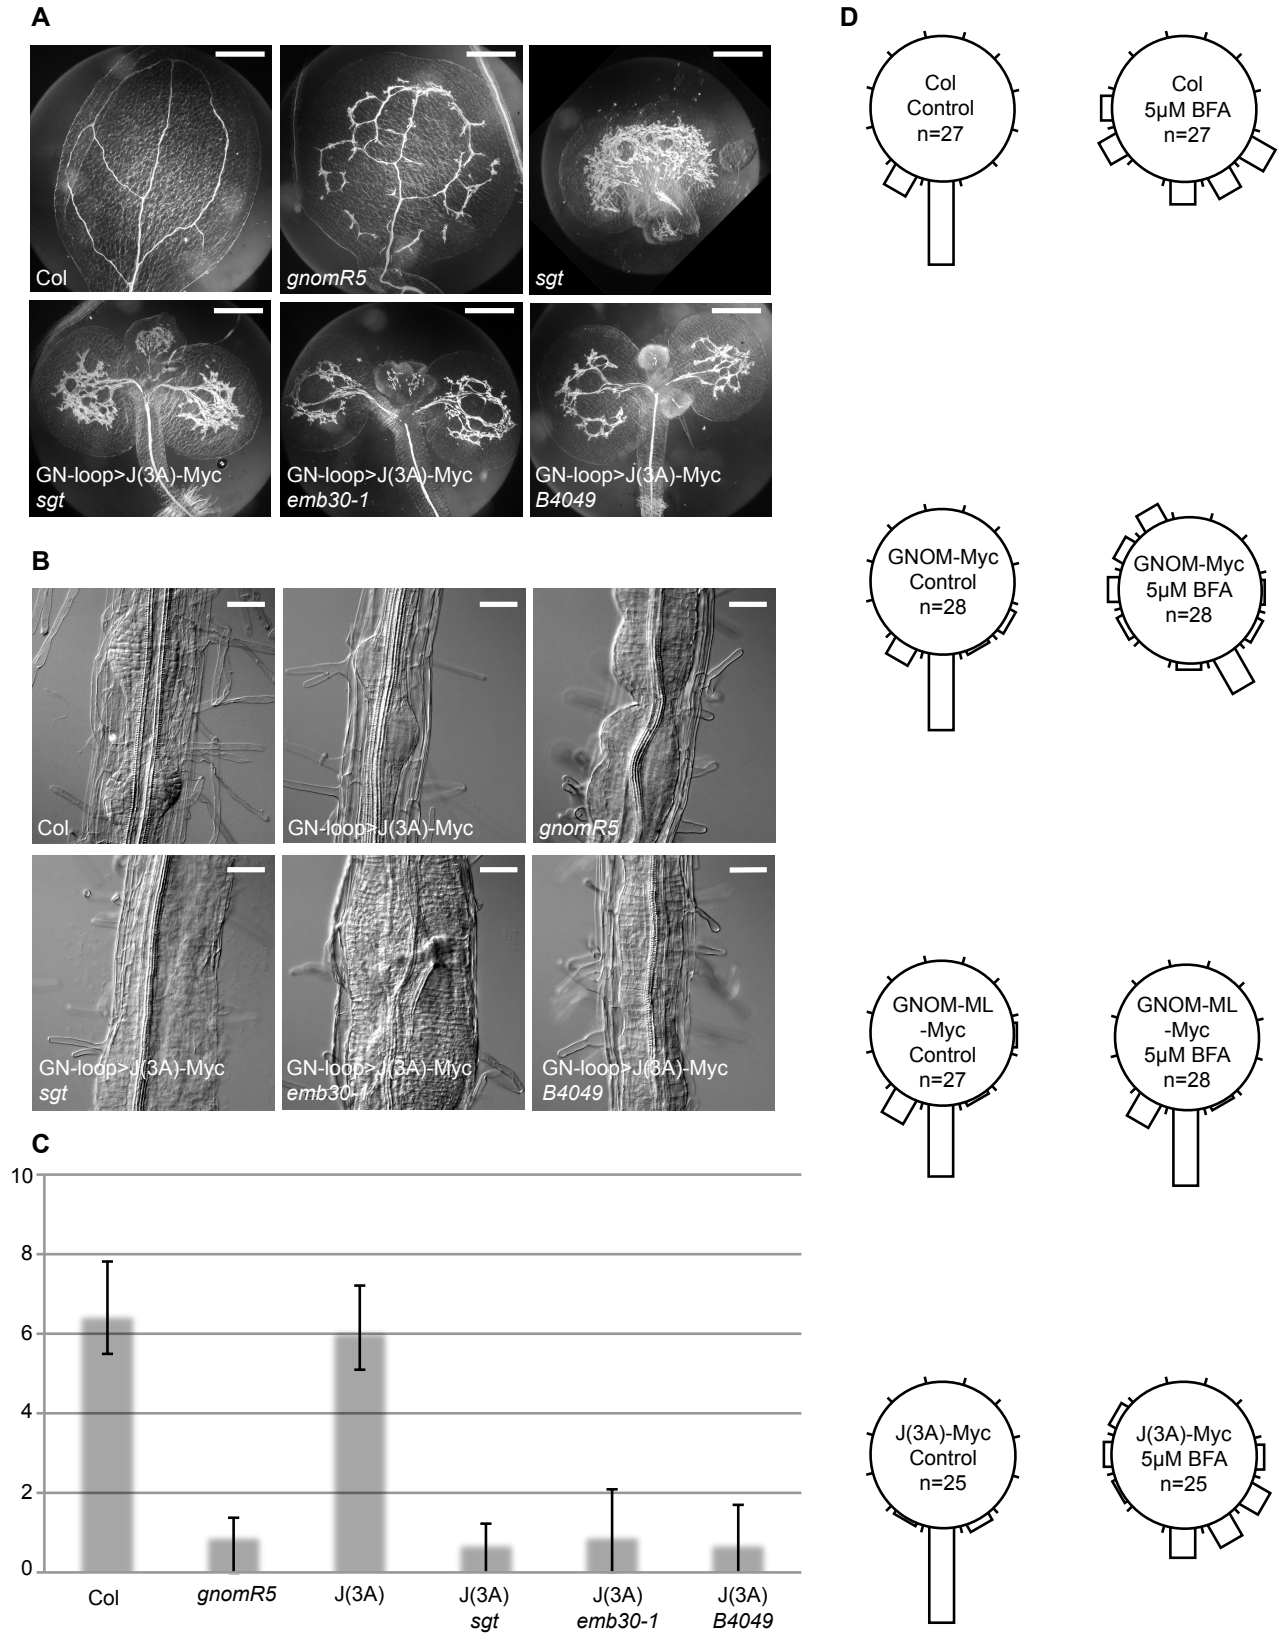

**Figure 4. Seedling phenotypes of *gnom* mutants bearing the *GN-loop>J(3A)-Myc* transgene.**

(A) Vascular tissue differentiation in cotyledon. Scale bars, 500  $\mu$ m.

(B) Lateral root initiation. Scale bars, 50  $\mu$ m.

(C) Primary root length (in mm). J(3A), GN-loop>J(3A) in wild-type background or in different *gnom* mutant genotypes indicated (*sgt*, *emb30-1*, *B4049*).

(D) Root gravitropism in seedlings treated with 5  $\mu$ M BFA and untreated control seedlings.

GN-loop>J(3A)-myc (J(3A)) in wild-type background behaves like Col or GN-myc.

Col, wild-type; *gnomR5*, weak mutant allele; J(3A), GN-loop>J(3A) in wild-type background; *sgt*, *gnom*-*sgt* deletion; *emb30-1*, catalytically defective *gnom*-*emb30*; *B4049*, membrane-association-defective *gnom*-*B4049*; *GNOM-Myc*, *GNOM-Myc* transgene; *GNOM-ML-Myc*, engineered BFA-resistant *GNOM*; *J(3A)-Myc*, *GN-loop>J(3A)-Myc* transgene.

118 In the wild-type background, GN>loop>J(3A) had no noticeable phenotypic effects e.g. in primary root  
119 growth or root gravitropic response and displayed BFA-sensitivity, like wild-type (Figure 4C and D).  
120 Postembryonally, *GN-loop>J(3A)* plants had a twisted rosette, similar to *emb30/B4049* trans-heterozygous  
121 plants, but subsequently grew to normal height during flowering (Figure 5).

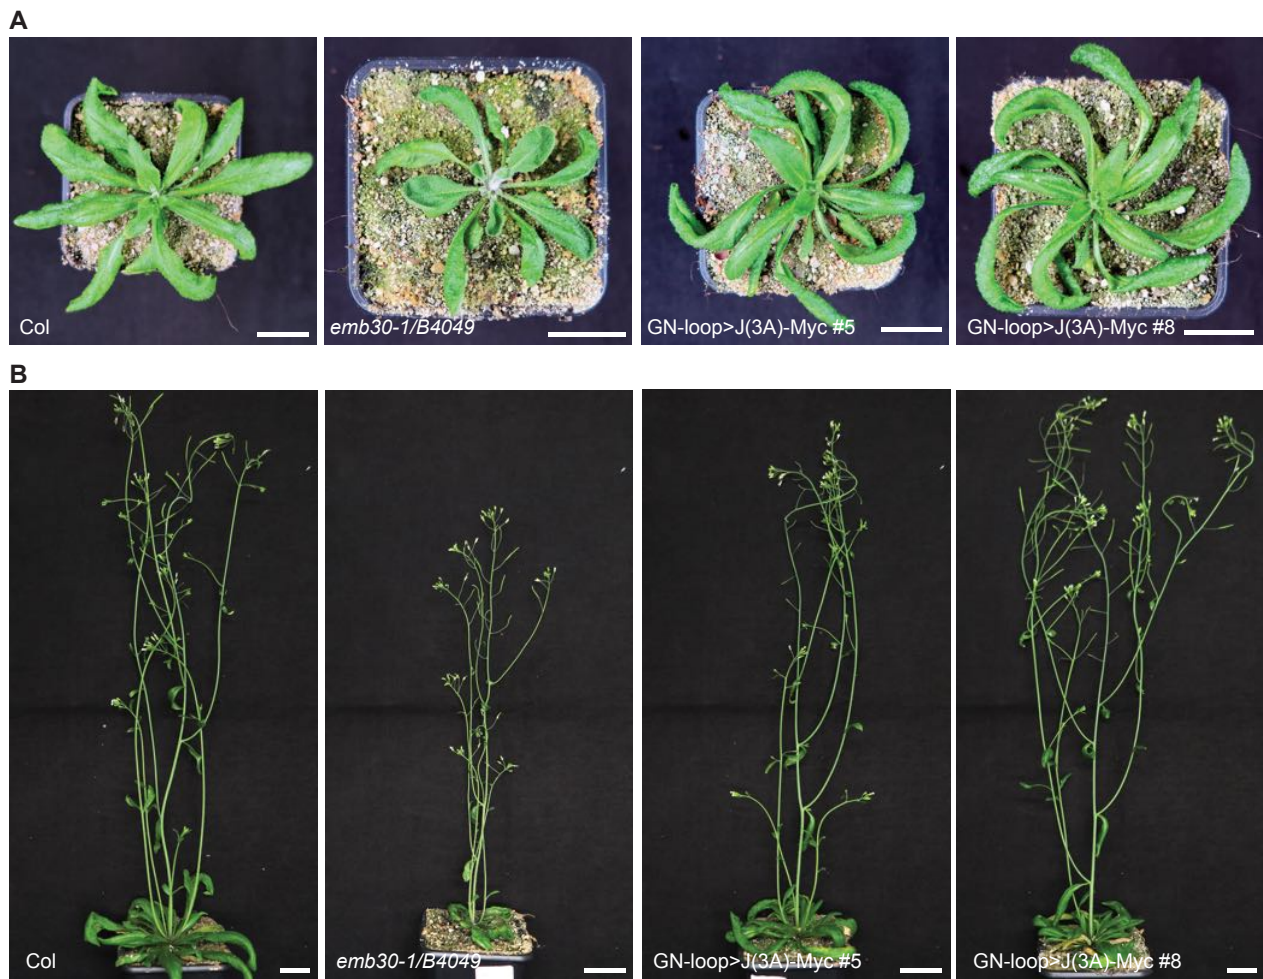

**Figure 5. Developmental phenotypes of wild-type plants expressing GN-loop>J(3A)-Myc.**

(A) Rosette stage. Col, wild-type. Note slightly twisted rosettes of *trans*-heterozygous plants bearing nearly fully complementing *gnom* alleles (*emb30-1/B4049*) and of *GN-loop>J(3A)-Myc* transgene in Col-0 (two transgenic lines #5, #8).

(B) Plants after the onset of flowering. Same genotypes as in (A). Note nearly normal stature of *GN-loop>J(3A)-Myc* transgenic plants.

Scale bars, 2 cm.

122 In conclusion, the GN>loop>J(3A) mutant protein seems to retain residual activity but cannot be  
123 complemented by previously defined GNOM mutant proteins with specific defects in membrane association  
124 (B4049) or GDP-GTP exchange activity (*emb30*).

125  
126 Because the human ARF-GEF GBF1 with a J-loop mutation displayed impaired ARF1 binding (Lowery et  
127 al., 2011), we addressed this issue, using co-immunoprecipitation assays. ARF1-YFP was co-  
128 immunoprecipitated with Myc-tagged GNOM wild-type protein but not with Myc-tagged GN-loop>J(3A)  
129 mutant protein, using anti-YFP or anti-Myc beads (Figure 6A and 6B). This compromised interaction  
130 between GN-loop>J(3A) and ARF1•GDP was consistent with a mutant phenotype corresponding to low  
131 level of ARF-GEF activity of GNOM as described above (see Figure 3B-G and Figure 4). The  
132 phenotypically detectable residual activity of GN-loop>J(3A) mutant protein suggested that its strongly  
133 reduced interaction with ARF1 appeared to be below the detection limit. We thus stabilized the presumed  
134 interaction of the mutant ARF-GEF with ARF1 by estradiol-induced expression of activation-deficient  
135 ARF1-T<sub>31</sub>N-YFP, because the T<sub>31</sub>N mutation blocks the GDP-GTP exchange (Dascher and Balch, 1994).  
136 This change revealed interaction between GN-loop>J(3A) protein and ARF1 in the co-immunoprecipitation  
137 assay (Figure 6C). This result suggested that ARF1 binding was impaired but the GN-loop>J(3A) protein  
138 was still able to carry out the GDP-GTP exchange, consistent with the partial rescue of the *gnom-sgt*  
139 deletion.

140 The fungal toxin brefeldin A (BFA) inhibits the exchange reaction, thus stabilizing abortive complexes of  
141 ARF-GEF and ARF1•GDP on endomembranes (Geldner et al., 2003; Mossessova et al., 2003; Renault et  
142 al., 2003). Treating seedling roots with BFA resulted in co-localization of GNOM and ARF1 in endosomal  
143 membrane aggregates called BFA compartments (Figure 6D) (Geldner et al., 2003).



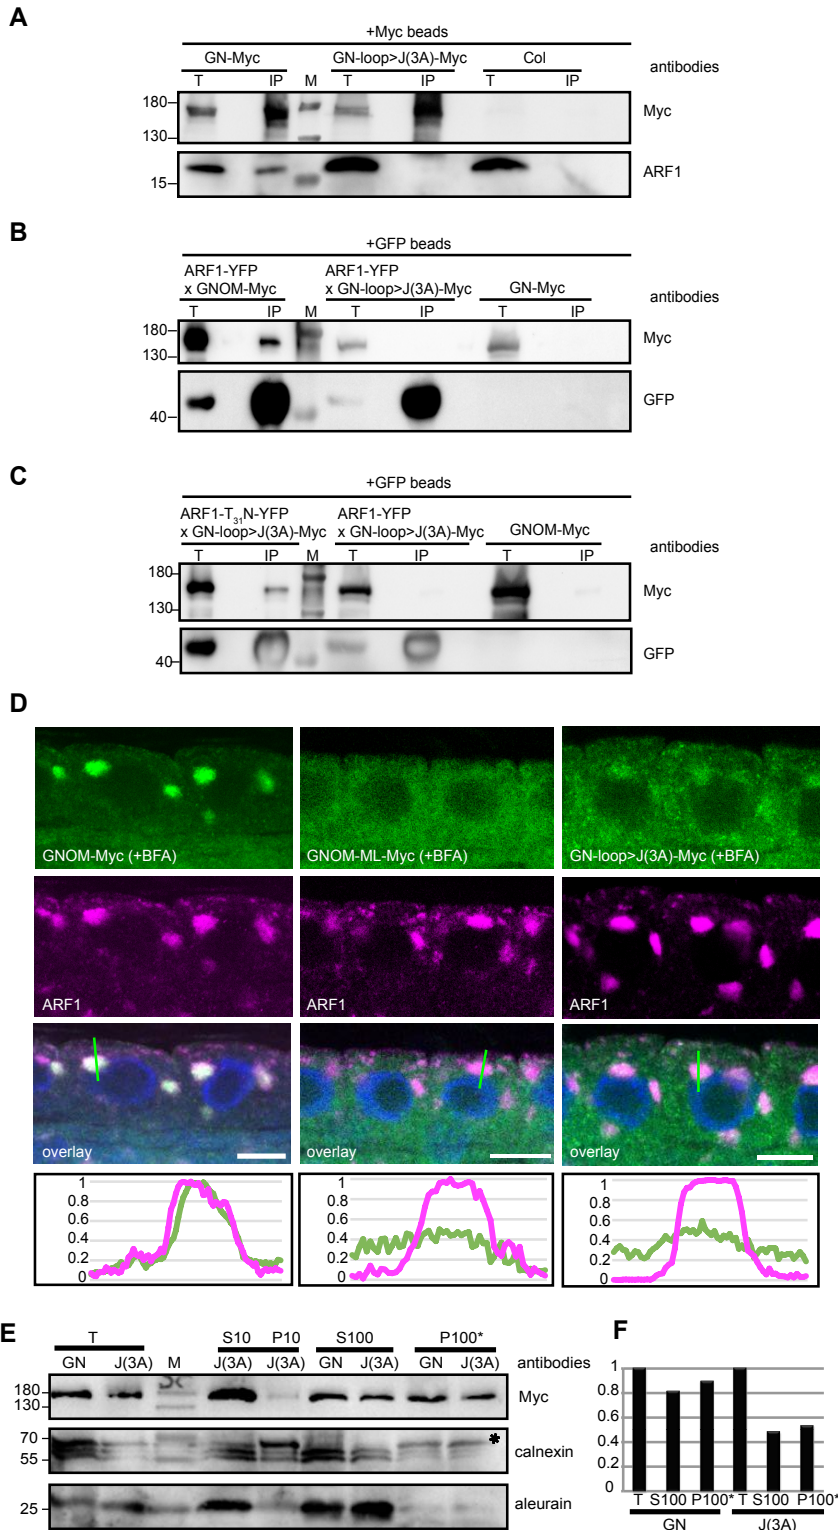

**Figure 6. ARF-GEF GN-loop>J(3A) mutant protein: interaction with ARF1, subcellular localization and membrane association**

(A-C) Co-immunoprecipitation from Arabidopsis seedling extracts. No detectable interaction of (A) endogenous ARF1 or (B) YFP-tagged ARF1 with GN-loop>J(3A)-Myc compared to GNOM-Myc wild-type control, following IP with (A) anti-Myc beads or (B) anti-GFP beads. (C) Activation-deficient ARF1-T<sub>31</sub>N-YFP yielded co-IP signal of GN-loop>J(3A)-Myc; IP with anti-GFP beads. Col, Columbia wild-type control. T, total extract; IP, immunoprecipitate; M, molecular markers (sizes in kDa, left).

(D) Immunostainings of BFA-treated seedling roots. GNOM co-localized with ARF1, GN-loop>J(3A) essentially behaved like engineered BFA-resistant GNOM-ML, not accumulating on the ARF1-positive endomembrane. Line scans are indicated with green lines.

(E, F) Cell fractionation revealed comparable partitioning between cytosol and membrane of Myc-tagged GNOM wild-type (GN) and Myc-tagged GN-loop>J(3A) mutant protein (J(3A)). (E) Immunoblot with antisera indicated on the right (controls: calnexin [asterisk], membrane protein (Huang et al., 1993); AALP, soluble protein (Holwerda et al., 1990); M, molecular markers (sizes in

kDa, left). (F) Quantitation of anti-Myc signal intensities; total extracts set at 1. T, total extract; S10 and P10, supernatant and pellet of 10,000 g centrifugation; S100 and P100\*, supernatant and washed pellet of 100,000 g centrifugation.

144 In contrast, co-localization of GN-loop>J(3A) with ARF1 in BFA compartments was strongly reduced, thus  
 145 resembling the strongly reduced accumulation of engineered BFA-resistant GNOM in ARF1-positive BFA  
 146 compartments (Figure 6D). This result left unanswered the question of whether membrane association of  
 147 GN-loop>J(3A) was reduced or the diminished BFA response was due to impaired ARF1 binding. Cell  
 148 fractionation of seedlings revealed that GN-loop>J(3A) mutant protein partitioned between cytosol and  
 149 membrane fraction like GNOM wild-type protein (Figure 6E and 6F). Membrane association of GNOM  
 150 requires interaction of its DCB domain with the complementary fragment called  $\Delta$ DCB, which is disrupted  
 151 in the membrane-association-deficient mutant protein GNOM(B4049) (Figure 7) (Anders et al., 2008b).

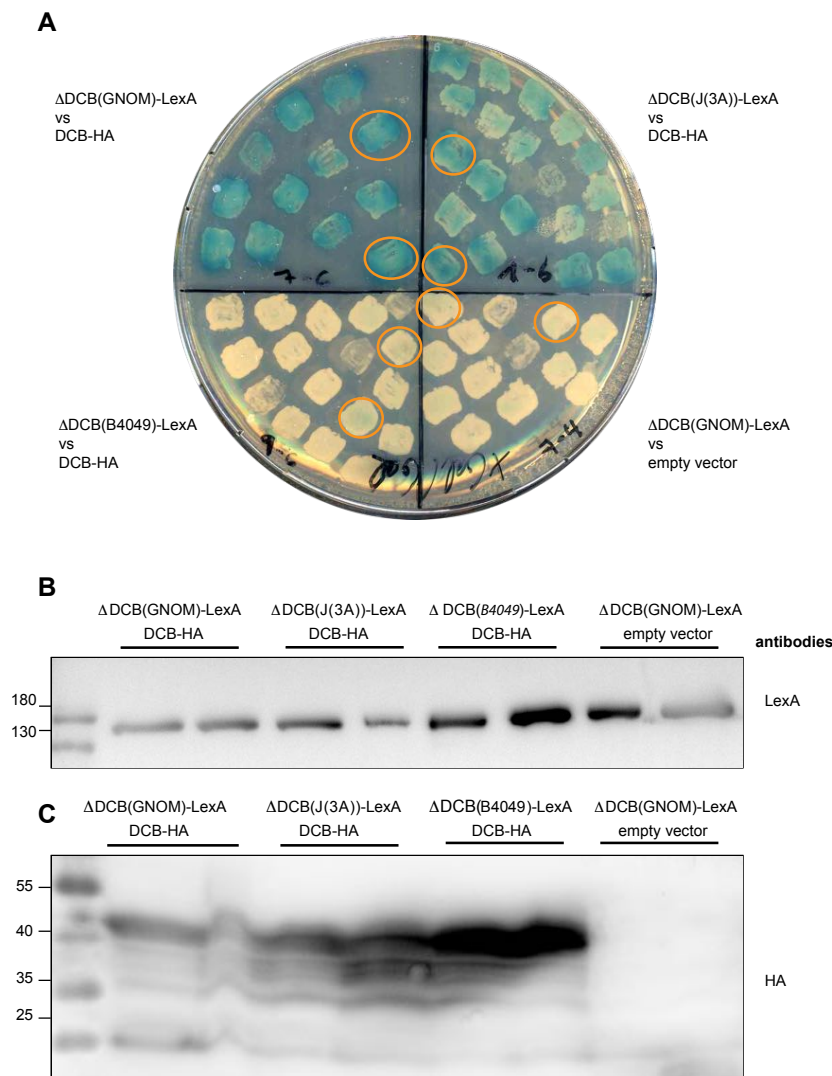

**Figure 7. Y2H assay for DCB- $\Delta$ DCB interaction of GN-loop>J(3A).**

(A)  $\beta$ -galactosidase activity stain. Unlike *gnom-B4049* (negative control, lower left), GN-loop>J(3A) (J(3A)) displayed DCB- $\Delta$ DCB interaction (upper right). Upper left: GNOM wild-type, (positive control; lower right: empty-vector control. See also Grebe et al., 2000 and Anders et al., 2008b.

(B, C) Expression levels of constructs used for the interaction assay (protein extracts from circled colonies in (A) detected by immunoblots with specific antisera indicated on the right: (B) LexA (DNA-binding domain) fused to  $\Delta$ DCB domains of GNOM wild-type (GNOM) and mutant (J(3A), GN-loop>J(3A); B4049, GNOM-B4049) proteins; (C) HA-tagged transactivation domain fused with DCB domain of GNOM (DCB-HA).

152 A yeast two-hybrid assay of DCB-ΔDCB interaction was positive for GN-loop>J(3A), like GNOM wild-  
 153 type and in contrast to GNOM(B4049) (Figure 7). In conclusion, several lines of evidence suggest that GN-  
 154 loop>J(3A) has normal membrane-association activity and that its BFA insensitivity is consistent with  
 155 reduced ARF1 binding.

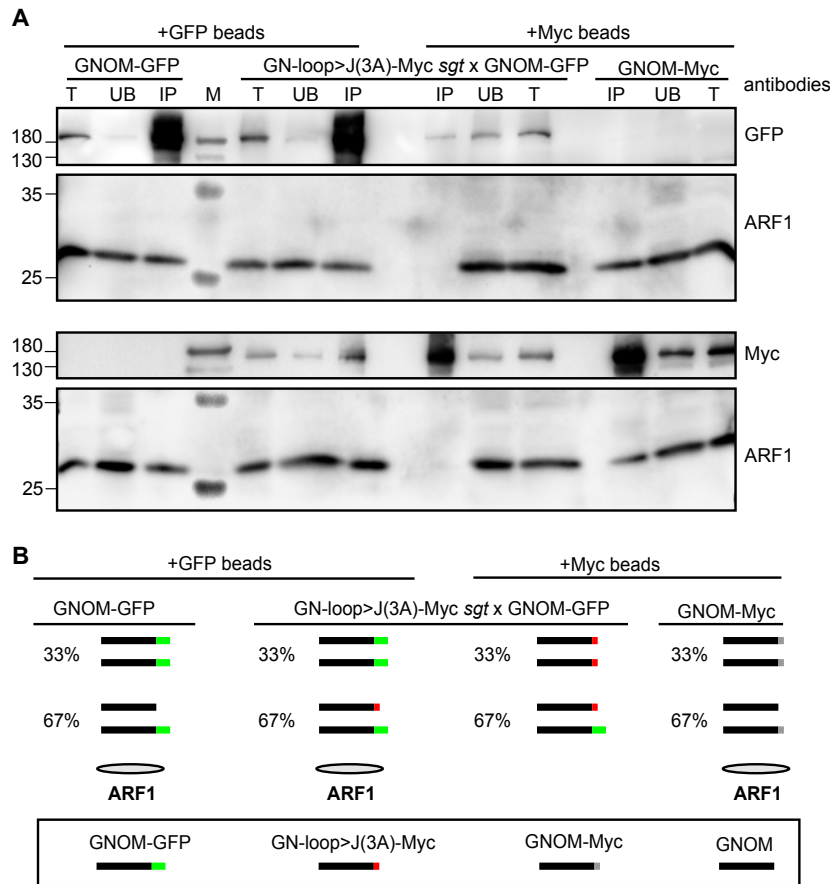

**Figure 8. ARF1 binding by ARF-GEF dimers**

(A) Co-immunoprecipitation of GNOM-GFP and GN-loop>J(3A)-Myc from seed-ling extracts with either anti-GFP or anti-Myc beads, revealing interaction of GNOM wild-type with GN-loop>J(3A)-Myc mutant protein but no ARF1 binding by GNOM heterodimer. Precipitates were probed with anti-GFP, anti-ARF1 and anti-Myc antisera. T, total extract; UB, unbound; IP, immunoprecipitate; M, molecular markers (sizes in kDa, left).

(B) Diagram of expected co-immunoprecipitation results showing precipitated GNOM dimers and ARF1. Tags: green, GNOM-GFP (wild-type); red, GN-loop>J(3A)-Myc (mutant); grey, GNOM-Myc (wild-type); no tag, endogenous GNOM.

156 GNOM like other ARF-GEFs forms dimers (Grebe et al., 2000; Anders et al., 2008b). Co-  
 157 immunoprecipitation with anti-Myc or anti-GFP beads revealed that Myc-tagged GN-loop>J(3A) mutant  
 158 protein was able to dimerize with GNOM-GFP wild-type protein (Figure 8A). However, endogenous ARF1  
 159 was only detected in the precipitate of anti-GFP beads, which suggested that ARF-GEF dimers consisting  
 160 of GNOM wild-type protein and GN-loop>J(3A) mutant protein have the same impaired interaction with  
 161 ARF1 as GN-loop>J(3A) homodimers (Figure 8A and 8B). This puzzling result is consistent with the  
 162 observation that GN-loop>J(3A) failed to rescue both *gnom-emb30* and *gnom-B4049* mutants, as described

163 above (see Figure 3 and 4; Supplemental Figure 1) (Anders et al., 2008b). These results suggest that strong  
164 interaction of ARF1 with its exchange factor requires simultaneous binding of two ARF1•GDP molecules  
165 by the two SEC7 domains of the ARF-GEF dimer.

166

### 167 **A model of ARF1 activation-dimerization and hydrolysis-monomerization cycle**

168 We propose the following model of how ARF1 dimers required for the scission of membrane vesicles are  
169 generated (Figure 9). Cytosolic GDP-bound ARF1 molecules are monomeric. They interact with membrane-  
170 associated ARF-GEF dimers, with the loop after helix J of the SEC7 domain playing a critical role in ARF1  
171 binding. Productive complex formation requires cooperativity, i.e. simultaneous interaction of two  
172 ARF1•GDP molecules with the two SEC7 domains of ARF-GEF dimers. As a consequence, two adjacent  
173 ARF1 molecules undergo conformational change, resulting in GDP-GTP exchange, membrane insertion of  
174 the myristoylated N-terminus, and direct physical interaction of the two adjacent ARF1•GTP molecules.  
175 Following vesicle scission, GAP-assisted hydrolysis of GTP would alter the conformation of ARF1,  
176 disrupting the dimer and releasing monomeric ARF1•GDP into the cytosol (Figure 9B). Considering the  
177 conservation of the overall domain organization of large ARF-GEFs (Casanova, 2007; Bui et al., 2009), it  
178 is highly likely that cooperative ARF1 binding by ARF-GEF dimers as a mechanism of forming active  
179 ARF1 GTPase dimers on the donor membrane applies to eukaryotes in general.

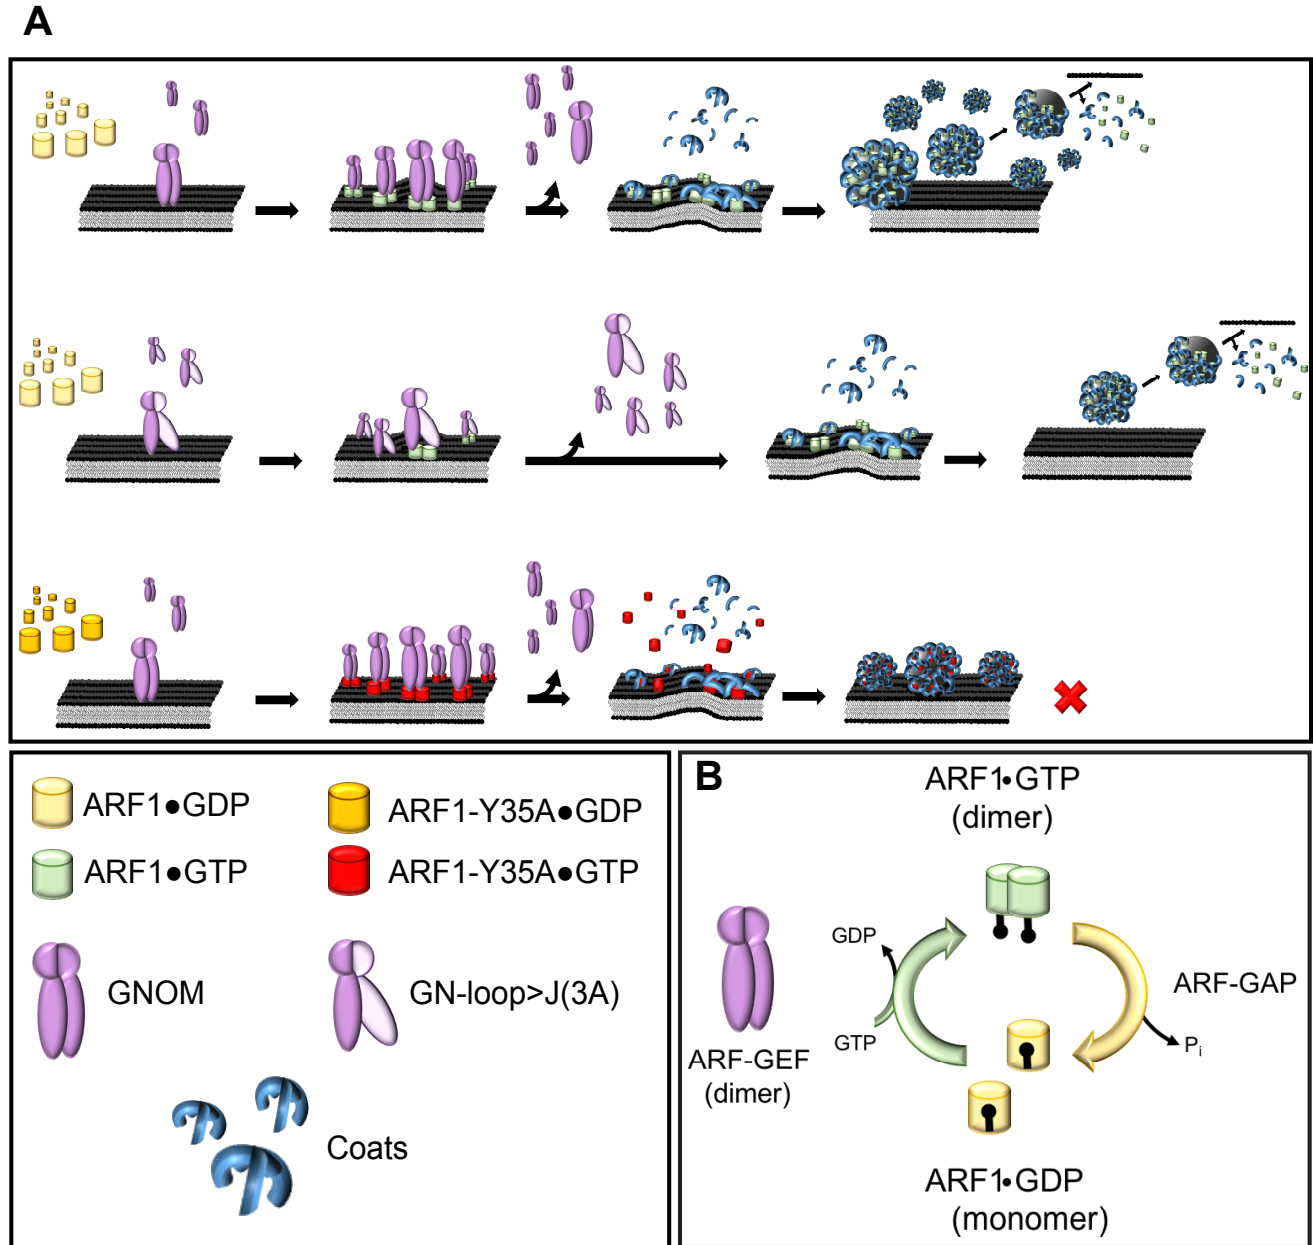

**Figure 9. Model of ARF1 dimer formation**

(A) Model of how ARF1 dimers required for scission of membrane vesicles are generated through simultaneous binding and activation by ARF-GEF dimers. ARF1 dimer formation by wild-type ARF-GEF dimers during GDP-GTP exchange on membrane (*top row*). GN-loop>J(3A) mutant protein reduces efficiency of ARF1 dimer formation because of reduced ARF1 binding (*middle row*). Two ARF1-Y<sub>35</sub>A proteins are each activated by ARF-GEF dimers but fail to interact, interfering with vesicle scission (*bottom row*).

(B) Activation-hydrolysis cycle. Two ARF•1GDP monomers are simultaneously activated by membrane-associated ARF-GEF dimer, resulting in ARF1•GTP dimer. GTP hydrolysis facilitated by GTPase-activating protein (ARF-GAP) releases ARF1•GDP monomers from the membrane into the cytosol;  $P_i$ , inorganic phosphate.



## 180 **Materials and Methods**

181 **Plant material and growth conditions.** Plants were grown under permanent light conditions (Osram  
182 L18W/840 cool white lamps) at 23°C and 40% humidity in growth chambers on soil or agar plates.  
183 Previously published lines that were used in this study: *gnom* mutant alleles *B4049*, *emb30-1*, *B4049/emb30-*  
184 *1* (Busch et al., 1996), *R5* (Geldner et al., 2004); transgenic lines expressing GNOM-Myc, GN-ML-Myc or  
185 GNOM-GFP from the *GNOM* promoter (Geldner et al., 2003), ARF1-YFP from *RPS5A* promoter and  
186 ARF1-T<sub>31</sub>N-YFP, ARF1-Q<sub>71</sub>L-YFP from an estradiol-inducible promoter (Singh and Richter et al., 2018).  
187 *gnom-sgt* mutant: The Ds-induced *sgt* allele was generated in an Ac-Ds mutagenesis experiment and isolated  
188 for its *gnom*-like mutant phenotype (insertion line SGT2467; Kumaran et al., 1999). The deletion on  
189 chromosome 1 eliminates nine genes from At1g13940 (5' end of Ds) to At1g14020 (3'end of Ds) including  
190 *GNOM* (At1g13980; Figure 3B). For genotyping the following primers were used (Figure 3C and 3D):  
191 Primers for detection of *gnom-sgt* deletion (expected band size: 270 bp):  
192 (N.A. 212) In At1g13940-sense: 5' GGGGGGAGGGTATAAGAG 3'  
193 (N.A. 213) DS-element-5'-antisense: 5' ACGGTCGGGAAACTAGCTCTAC 3'  
194 (N.A. 210) DS-element-3'-sense: 5' GGTCCCCGTCCGATTTGACT 3'  
195 (N.A. 211) In At1g14020-antisense: 5' AAGACACATGAGTGATTC 3'  
196 Primers for detection of *gnom-sgt* homozygosity (expected band sizes: Myc-tagged *GNOM* transgene, 496  
197 bp; endogenous *GNOM* gene, 373 bp; *gnom-sgt* homozygotes with transgene, 496 bp only):  
198 (S.R.264) GNOM-over-tag-sense: 5' GAAAGTGAAAGTAAGAGGC 3'  
199 (S.R.263) GNOM-over-tag-antisense: 5' CGTAGAGAGGTGTTACATAAG 3'.  
200 Primers for detection of *B4049* mutation in *B4049/+* heterozygous seedlings (expected band sizes: allele  
201 *B4049*, 535 bp; wild-type allele, no band):  
202 (M.E.N.64) *B4049*-mut-for: 5' TTAACAGGGATCCAAAGAATA 3'  
203 (M.E.N.66) 3A-WT-rev: 5' TCTGGAGTAGTCCTGATCTC 3'.  
204 Primers for detection of wild-type *GNOM* in *B4049/+* heterozygous seedlings (expected band sizes: wild-  
205 type allele, 535 bp; allele *B4049*, no band):

206 (M.E.N.65) B4049-WT-for: 5' TTAACAGGGATCCAAAGAATG 3'

207 (M.E.N.66) 3A-WT-rev: 5' TCTGGAGTAGTCCTGATCTC 3'.

208 *emb30-1* genotyping:

209 A first PCR amplifying a 2496bp *GNOM* fragment including the *emb30-1* mutation site was performed with  
210 the primers:

211 (S.R.36) T391-S: 5' TTCAAGTTCTCAATGAGTTTGCT 3'

212 (S.R.87) *emb30-homo-AS*: 5' CTCACCTTGTAAGGTCACGAACCAGTT 3'.

213 The first PCR product was used as a template for another PCR amplifying a 357bp *GNOM* fragment  
214 including the *emb30-1* mutation sites with the primers:

215 (S.R.36) T391-S: 5' TTCAAGTTCTCAATGAGTTTGCT 3'

216 (S.R.37) T391-AS: 5' CATTGTTGCAGATGGAGTGAA 3'.

217 The PCR product was cleaved using the restriction enzyme *HinfI* to distinguish the *emb30-1* mutant allele  
218 from the *GNOM* wild-type allele in the segregating *emb30/+* population. The expected restriction patterns  
219 are: wild-type allele, 193 bp, 65 bp, 47 bp, 32 bp, 20 bp; allele *emb30-1*, 193 bp, 97 bp, 47 bp, 20 bp.

## 220 Binary vector constructs, generation of transgenic plants and crosses

221 To generate the loop>J(3A) mutation, the amino acids residues 744, 745 and 747 (EI(R)T) were changed to  
222 alanines (AARA) by site-directed mutagenesis. Mutagenesis PCR was performed on the genomic fragment  
223 *GNXbaI<sup>wt</sup>-Myc* (Geldner et al., 2003) in pBlueScript, using the following primers:

224 Loop>J(3A) sense: 5' AATGCGGCCAGGGCTACTCCAGAACAAGGTGC 3'

225 Loop>J(3A) rev: 5' AGTAGCCCTGGCCGCATTGTTGCAGATGGAGTG 3'.

226 The *GN::GN-loop>J(3A)XbaI-Myc* fragment was cloned via *XbaI* into pGreenII(Bar) expression vector and  
227 transformed into *Arabidopsis thaliana* ecotype Col-0. T1 plants were selected using phosphinotricine. Four  
228 different transgenic lines showed good expression and two of them were chosen for further analysis.

229 *GN-loop>J(3A)-Myc* #5 was crossed into *sgt*, *B4049*, *emb30-1* backgrounds and analyzed for  
230 complementation. For co-immunoprecipitation analysis, *GN-loop>J(3A)-Myc* was crossed with



231 *RPS5A::ARF1-YFP* or *EST::ARF1-T<sub>31</sub>N-YFP*, and *GN-loop>J(3A)-Myc* (*sgt* heterozygous background)  
232 was crossed with *GNOM-GFP*.

233 To generate an estradiol-inducible ARF1-YFP variant, site-directed mutagenesis was performed on pEntry-  
234 ARF1-T<sub>31</sub>N-YFP (Singh and Richter et al., 2018), using the following primer combination:

235 ARFA1C-WT-MUT-S: 5' [Phos]GCTGGTAAGAcgACTATCCTcTACAAGC 3'

236 ARFA1C-WT-MUT-AS: 5' AGCATCGAGACCAACCATC 3'.

237 The Y<sub>35</sub>A mutation was introduced into pEntry-ARF1-YFP, pEntry-ARF1-TN-YFP and ARF1-QL-YFP by  
238 site-directed mutagenesis using the following primers:

239 ARFA1C-Y<sub>35</sub>A-MUT-S: 5' [Phos]TACTATCCTCgcaAAGCTCAAACCTGGAGAGATC 3'

240 ARFA1C-Y<sub>35</sub>A-MUT-AS: 5' TTCTTACCAGCAGCATCG 3'.

241 To generate RFP-tagged ARF1 variants, the CDS of RFP with a N-terminal AvrII restriction site was  
242 amplified and cloned into pDONR221 (Invitrogen) generating a pEntry clone. The RFP gene and part of the  
243 KAN resistance gene of the pEntry clone were then introduced via AvrII and SspI restrictions sites into the  
244 YFP-tagged ARFA1c Entry clones mentioned above, thereby replacing the YFP tag. The different ARF1  
245 fragments were then introduced into a modified  $\beta$ -estradiol-inducible pMDC7 vector by gateway LR  
246 reaction (Singh and Richter et al., 2018).

247 **Cloning of constructs for transient expression in protoplasts.** CDS of ARFA1C, ARFA1C-T<sub>31</sub>N and  
248 ARFA1C-Y<sub>35</sub>A were amplified from pEntry clones mentioned above by using Sense-Primers containing  
249 NheI restriction site and Antisense-Primers containing BamHI restriction site. Amplified ARF fragments  
250 were introduced into pFK059 (Singh and Richter et al., 2018) via NheI and BamHI restriction sites.

251 NheI-ARFA1C-S: 5' gatctcgctagcATGGGGTTGTCATTCGGAAAGTT 3'

252 BamHI-Stop-ARFA1C-AS: 5' ggcagtggatccCTATGCCTTGCTTGCATGTTGT 3'.

253 **Physiological tests.** For primary root growth assays, 50 five-days old seedlings were transferred to agar  
254 plates containing 10  $\mu$ M BFA for 24h and seedling growth was analyzed using ImageJ software. Gravitropic  
255 response of 50 five-days old seedlings was measured by ImageJ software after transferring seedlings to 10  
256  $\mu$ M BFA plates and rotating them by 135° for 24h. Lateral root primordia formation was analyzed after

257 transferring 7-day old seedlings for 3 days on 20  $\mu$ M NAA-containing agar plates and clearing the roots  
258 (Geldner et al., 2004). To examine the vasculature of 7 to 10-days old cotyledons, seedlings were shaken  
259 for several hours in 3:1 ethanol/acetic acid solution at room temperature (Geldner et al., 2004). Light  
260 microscopy images were taken with Zeiss Axiophot microscope, AxioCam and AxioVision\_4 Software.  
261 Image size, brightness and contrast were edited with Adobe Photoshop CS 3 Software.

262 **Yeast two-hybrid interaction assays.** Assay and constructs of GNOM-DCB (aa 1-246), GNOM- $\Delta$ DCB  
263 (aa 232-1451) and GNOM- $\Delta$ DCB(B4049) (aa 232-1451; G579R) were as described (Grebe et al., 2000;  
264 Anders et al., 2008b). GNOM- $\Delta$ DCB(J(3A)) was generated by site-directed mutagenesis using primers  
265 mentioned above.

266 **Quantitative transport assays.** Protoplasts were prepared and electrotransfected as previously described  
267 (Künzl et al. 2016). Harvesting and analysis of medium and cell samples as well as calculation of the  
268 secretion index was performed as described (Bubeck et al., 2008). ARF1 expression levels were evidenced  
269 indirectly by detection of GFP. Both *ARF1* and *GFP* coding sequences are under control of the bidirectional  
270 *mas* promoter (consisting of a *mas1'* and a *mas2'* part) on the same plasmid, with *mas1'* directing GFP  
271 expression and *mas2'* directing ARF1 expression in a ratio of 1:10.

272 **Whole-mount immunofluorescence staining.** Four to six-days old seedlings were incubated in 24-well  
273 cell-culture plates for 1 hour in 50  $\mu$ M BFA (Invitrogen, Thermo Fisher Scientific) containing liquid growth  
274 medium (0.5x MS medium, 1% sucrose, pH 5.8) at 23°C and then fixed for 1 hour in 4% formaldehyde in  
275 MTSB at room temperature. Whole-mount immunofluorescence staining was performed manually as  
276 described (Lauber et al., 1997) or with an InsituPro machine (Intavis) (Müller et al., 2008). All antibodies  
277 were diluted in 1x PBS buffer. The following antisera were used for immunofluorescence staining: mouse  
278 anti-c-Myc mAb 9E10 (Santa Cruz Biotechnology) diluted 1:600; rabbit anti-ARF1 (Agrisera) diluted  
279 1:1000; rabbit anti-At $\gamma$ COP (Agrisera) diluted 1:1000; anti-mouse Alexa488 (Invitrogen) and anti-rabbit  
280 CY3 (Dianova)-conjugated secondary antibodies were diluted 1:600. Nuclei were stained with DAPI (1:600  
281 dilution).

282 **Confocal microscopy and processing of images.** Fluorescence images were acquired with the confocal  
283 laser scanning microscope TCS-SP2 or SP8 from Leica, using a 63x water-immersion objective and Leica  
284 software; Zeiss LSM880 with Airy Scan and Zeiss software was also used. Overlays and contrast/brightness  
285 adjustments of images were performed with Adobe Photoshop CS3 software. Intensity line profiling was  
286 performed with the respective software.

287 **FRET-FLIM analysis.** Four-to-five days old seedlings were incubated 4-6hours in liquid growth medium  
288 containing 20 $\mu$ M estradiol. FRET-FLIM measurements were performed at Leica TCS-SP8 upgraded with  
289 the rapidFLIM system from Picoquant (TimeHarp 260 time-correlated single-photon counting (TCSPC)  
290 module). YFP was excited with a pulsed 470 nm diode laser (LDHPC470B) with a 40 MHz pulse frequency.  
291 Emission was recorded at 495–550 nm by a HyD SMD detector until reaching a count of 1000 photons per  
292 pixel. Data were analyzed using the SymPhoTime software. n-exponential reconvolution with a mono-  
293 exponential decay function was used to fit the TCSPC histograms against a measured instrumental response  
294 function (IRF) (Fäßler and Pimpl, 2017; Mehlhorn et al., 2018). Box plots of measured fluorescence  
295 lifetimes were generated by using the box plot tyreslab web tool (<http://boxplot.tyerslab.com>; Spitzer et al.,  
296 2014). Statistical significance was calculated using a two-sample Student's t test. Measurements were taken  
297 from at least 5 different seedlings in epidermal cells near the differentiation zone of the root.

298 **EM analysis.** Four-to-five days old ARF1-YFP and ARF1-Y35A-YFP seedlings were incubated in liquid  
299 growth medium containing 10 $\mu$ M estradiol for 4h. For ultrastructural analysis, 1-1.5 mm long seedling root  
300 tips were high-pressure frozen, freeze-substituted in acetone containing 2.5% OsO<sub>4</sub> and embedded in epoxy  
301 resin. Ultrathin sections were stained with uranyl acetate and lead citrate and viewed in a Jeol JEM-1400plus  
302 TEM at 120 kV accelerating voltage. For more information, see (Singh and Richter et al., 2018).

303 **Subcellular fractionation.** 2g of plant material were ground in liquid nitrogen and suspended in 1:1  
304 extraction buffer (50mM Tris pH 7.5, 150mM NaCl, 1mM EDTA, 1mM PMSF) supplemented with protease  
305 inhibitors (cOmplete EDTA-free®, Roche). Of cell lysates, 100  $\mu$ l were taken as total fraction (T). Then  
306 cell lysates were cleared by centrifugation at 10,000 x g for 10 min at 4°C and 100  $\mu$ l of supernatant (S10)  
307 were saved for further analysis. The pellet was dissolved in 1 ml extraction buffer and 100  $\mu$ l were frozen

308 (P10). After 1x 100.000 x g centrifugation at 4°C for 1h, 100 µl supernatant (S100) were stored and the  
309 pellet was dissolved in 200 µl extraction buffer of which 100 µl were stored (P100\*). 25µl of 5x Lämmli  
310 buffer were added to 100 µl samples.

311 **Co-immunoprecipitation analysis.** The immunoprecipitation protocol was modified from ref. 31. 3-5g of  
312 8 to 10-days old Arabidopsis seedlings were homogenized in 1:1 lysis buffer containing 1% Triton-X100.  
313 Seedlings bearing estradiol-inducible ARF1-YFP, ARF1-T<sub>31</sub>N-YFP or ARF1-Q<sub>71</sub>L-YFP were incubated in  
314 20µM estradiol-containing liquid MS Media with sugar for 7h. For immunoprecipitation, anti-Myc-agarose  
315 beads (Sigma) or GFP-Trap beads (Chromotek) were incubated with the plant extracts at 4°C for 2h and 30  
316 min. Beads were then washed twice with wash buffer containing 0.1% Triton-X100 and three times without  
317 Triton-X100. Bound proteins were eluted by boiling the beads in 2x Lämmli buffer at 95°C for 5min. Twice  
318 the usual amount of beads was used for immunoprecipitation involving GN-loop>J(3A)-Myc with anti-Myc  
319 beads or ARF1-YFP with anti-GFP beads.

320 **SDS-PAGE and protein gel blotting.** SDS-PAGE and protein gel blotting with PVDF membranes  
321 (Millipore) were performed as described (Lauber et al. 1997). All antibodies were diluted in 5% milk/TBS-  
322 T solution. Antibodies and dilutions: mouse anti-c-Myc mAb 9E10 (Santa Cruz Biotechnology) 1:1000,  
323 mouse anti-GFP (Roche) 1:2500, rabbit anti-calnexin (Agrisera) 1:2000, rabbit anti-AALP (anti-aleurain  
324 (Holwerda et al., 1990)); a gift from Inhwon Hwang) 1:1000, rabbit anti-ARF1 (Agrisera) 1:2500, rabbit  
325 anti-SEC7 (Steinmann et al., 1999) 1:2500, mouse anti-LexA (Santa Cruz Biotechnology) 1:1000, POD-  
326 conjugated anti-HA (Roche) 1:4000, anti-mouse (Sigma) or anti-rabbit peroxidase-conjugated (Merck  
327 Millipore) or alkaline phosphatase-conjugated antibodies (Jackson Immuno Research) 1:10000. Detection  
328 was performed with the BM-chemiluminescence blotting substrate (Roche) and FusionFx7 imaging system  
329 (PeqLab). Image assembly was performed with Adobe Photoshop CS3, and ImageJ software was used for  
330 quantification of relative protein amounts.

331

332

333

334 **Acknowledgements**

335 We thank Tobias Pazen and Rebecca Stahl for technical assistance, Inwhan Hwang for providing published  
336 material, and Martin Bayer, Jeff Dangl, Christopher Grefen, Niko Geldner and Thorsten Nürnberger for  
337 discussion and critical reading of the manuscript.

338

339 **Funding**

340 This work was supported by the Deutsche Forschungsgemeinschaft (Ju 179/18-1 and SFB1101/A01 to G.  
341 J.; SFB1101/Z02 to Y.-D. S.) and a fellowship from the Carlsberg Foundation to M.E.N.

342

343 **Author contributions**

344 Conceptualization: G.J.; Investigation: S.B., M.E.N., S.R., H.B., Y.-D.S., M.K.S., A.-M.F.; Formal  
345 analysis: S.B.; Resources: V.S.; Visualization: S.B.; S.R.; Project administration: S.B., G.J.; Writing -  
346 original draft: G.J.; Writing - review & editing: S.B., M.E.N., S.R., H.B., Y.-D.S., M.E.N., A.-M.F., V.S.,  
347 G.J.; Funding acquisition: G.J., M.E.N., Y.-D.S.

348

349 **Competing interests**

350 No competing interests declared

351

352 **Data and materials availability**

353 All data are available in the manuscript or the supplementary materials. Materials are available on request  
354 from G.J. ([gerd.juergens@zmbp.uni-tuebingen.de](mailto:gerd.juergens@zmbp.uni-tuebingen.de)).

355

356

357

358

359

360 **References**

- 361 Anders, N. & Jürgens, G. (2008a). Large ARF guanine nucleotide exchange factors in membrane  
362 trafficking. *Cell. Mol. Life Sci.* **65**, 3433-3445
- 363 Anders, N., Nielsen, M., Keicher, J., Stierhof, Y.-D., Furutani, M., Tasaka, M., Skriver, K., Jürgens, G.  
364 (2008b). Membrane association of the *Arabidopsis* ARF exchange factor GNOM involves interaction  
365 of conserved domains. *Plant Cell* **20**, 142-151.
- 366 Beck, R., Sun, Z., Adolf, F., Rutz, C., Bassler, J., Wild, K., Sinning, I., Hurt, E., Brügger, B., Béthune, J.,  
367 Wieland, F. (2008). Membrane curvature induced by Arf1-GTP is essential for vesicle formation. *Proc.*  
368 *Natl. Acad. Sci. USA* **105**, 11731-11736.
- 369 Beck, R. Prinz, S., Diestelkötter-Bachert, P., Röhling, S., Adolf, F., Hoehner, K., Welsch, S., Ronchi, P.,  
370 Brügger, B., Briggs, J. A., Wieland, F. (2011). Coatomer and dimeric ADP ribosylation factor 1  
371 promote distinct steps in membrane scission. *J. Cell Biol.* **194**, 765-777.
- 372 Bubeck, J., Scheuring, D., Hummel, E., Langhans, M., Viotti, C., Foresti, O., Denecke, J., Banfield, D. K.,  
373 and Robinson, D. G. (2008). The syntaxins SYP31 and SYP81 control ER-Golgi trafficking in the  
374 plant secretory pathway. *Traffic* **9**, 1629-1652.
- 375 Bui, Q. T., Golinelli-Cohen, M. P., Jackson, C. L. (2009). Large Arf1 guanine nucleotide exchange  
376 factors: evolution, domain structure, and roles in membrane trafficking and human disease. *Mol. Genet.*  
377 *Genomics* **282**, 329-350.
- 378 Busch, M., Mayer, U., and Jürgens, G. (1996). Molecular analysis of the Arabidopsis pattern formation of  
379 gene *GNOM*: gene structure and intragenic complementation. *Mol. Gen. Genet.* **250**, 681-691.
- 380 Casanova, J. E. (2007). Regulation of Arf activation: the Sec7 family of guanine nucleotide exchange  
381 factors. *Traffic* **8**, 1476-1485.
- 382 Dascher, C., and Balch, W. E. (1994). Dominant inhibitory mutants of ARF1 block endoplasmic reticulum  
383 to Golgi transport and trigger disassembly of the Golgi apparatus. *J. Biol. Chem.* **269**, 1437-1448.
- 384 Donaldson, J. G. & Jackson, C. L. (2011). ARF family G proteins and their regulators: roles in membrane  
385 transport, development and disease. *Nat. Rev. Mol. Cell Biol.* **12**, 362-375.

- 386 D'Souza-Schorey, C. & Chavrier, P. (2006). ARF proteins: roles in membrane traffic and beyond. *Nat.*  
387 *Rev. Mol. Cell Biol.* **7**, 347-358.
- 388 Fäßler, F. & Pimpl, P. (2017). In Vivo Interaction Studies by Measuring Förster Resonance Energy  
389 Transfer Through Fluorescence Lifetime Imaging Microscopy (FRET/FLIM). *Methods Mol. Biol.*  
390 **1662**, 159-170.
- 391 Geldner, N., Anders, N., Wolters, H., Keicher, J., Kornberger, W., Muller, P., Delbarre, A., Ueda, T.,  
392 Nakano, A., Jürgens, G. (2003). The Arabidopsis GNOM ARF-GEF mediates endosomal recycling,  
393 auxin transport, and auxin-dependent plant growth. *Cell* **112**, 219-230.
- 394 Geldner, N., Richter, S., Vieten, A., Marquardt, S., Torres-Ruiz, R.A., Mayer, U., Jürgens, G. (2004).  
395 Partial loss-of-function alleles reveal a role for *GNOM* in auxin transport-related, post-embryonic  
396 development of *Arabidopsis*. *Development* **131**, 389-400.
- 397 Gillingham, A. K. & Munro, S. (2007). The small G proteins of the Arf family and their regulators. *Annu.*  
398 *Rev. Cell Dev. Biol.* **23**, 579-611.
- 399 Grebe, M., Gadea, J., Steinmann, T., Kientz, M., Rahfeld, J.-U., Salchert, K., Koncz, C., Jürgens, G.  
400 (2000). A conserved domain of the *Arabidopsis* GNOM protein mediates subunit interaction and  
401 cyclophilin 5 binding. *Plant Cell* **12**, 343-356
- 402 Holwerda, B. C., Galvin, N. J., Baranski, T. J., and Rogers, J. C. (1990). In vitro processing of aleurain, a  
403 barley vacuolar thiol protease. *Plant Cell* **2**, 1091-1106.
- 404 Huang, L., Franklin, A. E., Hoffman, N. E. (1993). Primary structure and characterization of an  
405 *Arabidopsis thaliana* calnexin-like protein. *J. Biol. Chem.* **268**, 6560-6566.
- 406 Kumaran, M., Ye, D., Yang, W.-C., Sundaresan, V. (1999). The *DIRECTIONLESS* mutation affects the  
407 pattern formation in Arabidopsis. *10th Int. Congr. Arab. Res., Abstract 8-24, Melbourne, July 1999.*
- 408 Künzl, F., Frühholz, S., Fäßler, F., Li, B., and Pimpl, P. (2016). Receptor-mediated sorting of soluble  
409 vacuolar proteins ends at the trans-Golgi network/early endosome. *Nat. Plants* **2**, 16017.



- 410 Lauber, M. H., Waizenegger, I., Steinmann, T., Schwarz, H., Mayer, U., Hwang, I., Lukowitz, W., and  
411 Jürgens, G. (1997). The Arabidopsis KNOLLE protein is a cytokinesis-specific syntaxin. *J. Cell Biol.*  
412 **139**, 1485-1493.
- 413 Lowery, J., Szul, T., Seetharaman, J., Jian, X., Su, M., Forouhar, F., Xiao, R., Acton, T.B., Montelione, G.  
414 T., Lin, H., Wright, J. W., Lee, E., Holloway, Z. G., Randazzo, P. A., Tong, L., Sztul, E. (2011).  
415 Novel C-terminal motif within Sec7 domain of guanine nucleotide exchange factors regulates ADP-  
416 ribosylation factor (ARF) binding and activation. *J. Biol. Chem.* **286**, 36898-36906.
- 417 Mayer, U., Büttner, G., Jürgens, G. (1993) Apical-basal pattern formation in the Arabidopsis embryo –  
418 Studies on the role of the *GNOM* gene. *Development* **117**, 149-162.
- 419 Mehlhorn, D. G., Wallmeroth, N., Berendzen, K. W., Grefen, C. (2018). 2in1 Vectors Improve In Planta  
420 BiFC and FRET Analyses. *Methods Mol. Biol.* **1691**, 139-158.
- 421 Meinke, D.W. (1985) Embryo-lethal mutants of *Arabidopsis thaliana*: analysis of mutants with a wide  
422 range of lethal phases. *Theor. Appl. Genet.* **69**, 543-552.
- 423 Mossessova, E., Corpina, R. A., Goldberg, J. (2003). Crystal structure of ARF1\*Sec7 complexed with  
424 Brefeldin A and its implications for the guanine nucleotide exchange mechanism. *Mol. Cell* **12**, 1403-  
425 1411.
- 426 Müller, A., Guan, C., Gälweiler, L., Tänzler, P., Huijser, P., Marchant, A., Parry, G., Bennett, M.,  
427 Wisman, E., Palme, K. (1998). AtPIN2 defines a locus of Arabidopsis for root gravitropism control.  
428 *EMBO J.* **17**, 6903-6911.
- 429 Ramaen, O. Joubert, A., Simister, P., Belgareh-Touzé, N., Olivares-Sanchez, M.C., Zeeh, J.C., Chantalat,  
430 S., Golinelli-Cohen, M.P., Jackson, C.L., Biou, V., Cherfils, J. (2007). Interactions between conserved  
431 domains within homodimers in the BIG1, BIG2, and GBF1 Arf guanine nucleotide exchange factors. *J.*  
432 *Biol. Chem.* **282**, 28834-28842.
- 433 Renault, L., Guibert, B., Cherfils, J. (2003). Structural snapshots of the mechanism and inhibition of a  
434 guanine nucleotide exchange factor. *Nature* **426**, 525-530.

435 Richter, S., Geldner, N., Schrader, J., Wolters, H., Stierhof, Y.-D., Rios, G., Koncz, C., Robinson, D.G.,  
436 Jürgens, G. (2007). Functional diversification of closely related ARF-GEFs in protein secretion and  
437 recycling. *Nature* **448**, 488-492.

438 Shevell, D. E., Leu, W. M., Gillmor, C. S., Xia, G., Feldmann, K. A., Chua, N. H. (1994). EMB30 is  
439 essential for normal cell division, cell expansion, and cell adhesion in Arabidopsis and encodes a  
440 protein that has similarity to Sec7. *Cell* **77**, 1051-1062.

441 Singh, M. K., Krüger, F., Beckmann, H., Brumm, S., Vermeer, J.E., Munnik, T., Mayer, U., Stierhof, Y.  
442 D., Grefen, C., Schumacher, K., Jürgens, G. (2014). Protein delivery to vacuole requires SAND  
443 protein-dependent Rab GTPase conversion for MVB-vacuole fusion. *Curr. Biol.* **24**, 1383-1389.

444 Singh, M. K. & Jürgens, G. (2018). Specificity of plant membrane trafficking - ARFs, regulators and coat  
445 proteins. *Semin. Cell Dev. Biol.* **80**, 85-93.

446 Singh, M. K., Richter, S., Beckmann, H., Kientz, M., Stierhof, Y.-D., Anders, N., Fässler, F., Nielsen, M.,  
447 Knöll, C., Thomann, A., Franz-Wachtel, M., Macek, B., Skriver, K., Pimpl, P., Jürgens, G. (2018). A  
448 single class of ARF GTPase activated by several pathway-specific ARF-GEFs regulates membrane  
449 traffic in Arabidopsis. *PLoS Genet.* **14**, e1007795.

450 Spitzer, M., Wildenhain, J., Rappsilber, J., Tyers, M. (2014). BoxPlotR: a web tool for generation of box  
451 plots. *Nat. Methods* **11**, 121-122.

452 Steinmann, T., Geldner, N., Grebe, M., Mangold, S., Jackson, C.L., Paris, S., Gälweiler, L., Palme, K.,  
453 Jürgens, G. (1999). Coordinated polar localization of auxin efflux carrier PIN1 by GNOM ARF GEF.  
454 *Science* **286**, 316-318.

455  
456  
457  
458  
459  
460  
461  
462

463 Supplemental data

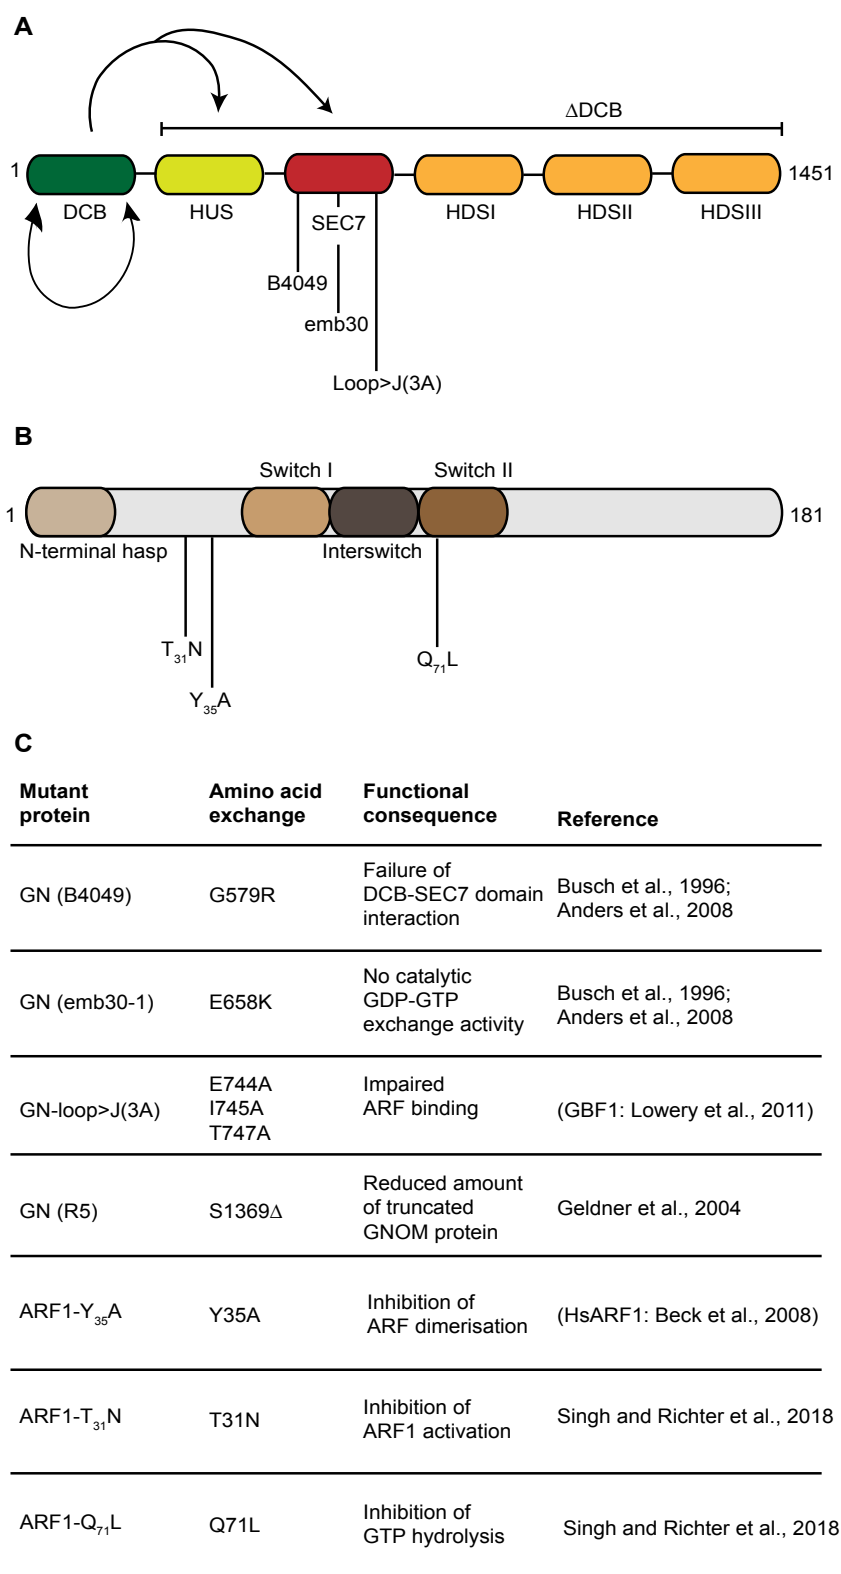

**Supplemental Figure 1.**  
**Overview of mutant variants of ARF-GEF GNOM and ARF1 used in this study.**

(A, B) Schematic presentations of domain architecture for GNOM (A) and ARF1 (B) with relevant mutations indicated. The DCB domain (green) interacts with another DCB domain and with both HUS domain (yellow) and catalytic SEC7 domain (red) of the complementary ΔDCB fragment (arrows). Not drawn to scale: GNOM, 1451 aa; ARF1, 181 aa. (C) Functional consequences of amino acid exchange in mutant proteins.
